# Supplementary material
Source: MDPI journal article supplement (https://www.mdpi.com/2079-6412/13/11/1852)
Supplement: s1 [file s1]

## Supplementary Materials

**Table S1.** TG/DTG data for meta- and para-aramid woven fabrics unmodified and modified with AgNWs, mixture (Ag + S) and layer by layer (Ag/S) method.

| Sample   | Silanes                    |                          |                           |                                     | PVP                        |                          |                           |                                 | Aramid                     |                          |                           |                           |                                    |                                    |
|----------|----------------------------|--------------------------|---------------------------|-------------------------------------|----------------------------|--------------------------|---------------------------|---------------------------------|----------------------------|--------------------------|---------------------------|---------------------------|------------------------------------|------------------------------------|
|          | T <sub>Onset</sub><br>[°C] | T <sub>End</sub><br>[°C] | T <sub>Peak</sub><br>[°C] | Weight<br>loss of<br>silanes<br>[%] | T <sub>Onset</sub><br>[°C] | T <sub>End</sub><br>[°C] | T <sub>Peak</sub><br>[°C] | Weight<br>loss<br>of PVP<br>[%] | T <sub>Onset</sub><br>[°C] | T <sub>End</sub><br>[°C] | T <sub>Peak</sub><br>[°C] | T <sub>Peak</sub><br>[°C] | Weight<br>loss of<br>aramid<br>[%] | Weight<br>loss in<br>800 °C<br>[%] |
| PVP      |                            |                          |                           |                                     | 398 ± 2                    | 470 ± 1                  | 432 ± 1                   | 98 ± 1                          |                            |                          |                           |                           |                                    |                                    |
| AgNWs    |                            |                          |                           |                                     | 390 ± 4                    | 455 ± 2                  | 427 ± 1                   | 65 ± 2                          |                            |                          |                           |                           |                                    |                                    |
| mAr      | -                          | -                        | -                         | -                                   | -                          | -                        | -                         | -                               | 417 ± 2                    | 629 ± 3                  | 457 ± 3                   | 512 ± 2                   | 36 ± 4                             | 47 ± 4                             |
| mAr/Ag   |                            |                          |                           |                                     |                            |                          |                           |                                 | 389 ± 3                    | 625 ± 3                  | 458 ± 1                   | 537 ± 1                   | 41 ± 2                             | 51 ± 1                             |
| mAr/Ag+S | 285 ± 5                    | 349 ± 2                  | 320 ± 1                   | 2 ± 1                               | -                          | -                        | -                         | -                               | 402 ± 2                    | 619 ± 2                  | 465 ± 1                   | 546 ± 1                   | 40 ± 1                             | 49 ± 1                             |
| mAr/Ag/S | 297 ± 2                    | 363 ± 1                  | 339 ± 2                   | 3 ± 1                               | -                          | -                        | -                         | -                               | 403 ± 2                    | 617 ± 3                  | 467 ± 2                   | 545 ± 1                   | 39 ± 3                             | 49 ± 1                             |
| pAr      | -                          | -                        | -                         | -                                   | -                          | -                        | -                         | -                               | 554 ± 2                    | 621 ± 1                  | 587 ± 3                   | -                         | 52 ± 1                             | 60 ± 3                             |
| pAr/Ag   |                            |                          |                           |                                     | 377 ± 3                    | 449 ± 2                  | 416 ± 3                   | 6 ± 2                           | 563 ± 2                    | 603 ± 3                  | 586 ± 1                   | -                         | 34 ± 3                             | 49 ± 2                             |
| pAr/Ag+S | 276 ± 1                    | 339 ± 1                  | 304 ± 1                   | 1 ± 1                               | 380 ± 1                    | 443 ± 3                  | 409 ± 1                   | 5 ± 1                           | 559 ± 1                    | 605 ± 2                  | 586 ± 1                   | -                         | 30 ± 1                             | 47 ± 1                             |
| pAr/Ag/S | 286 ± 3                    | 336 ± 0                  | 310 ± 1                   | 2 ± 1                               | 389 ± 2                    | 452 ± 3                  | 418 ± 3                   | 5 ± 1                           | 560 ± 1                    | 607 ± 0                  | 587 ± 1                   | -                         | 28 ± 1                             | 47 ± 1                             |

**Table S2.** DSC data for meta- and para-aramid woven fabrics unmodified and modified with AgNWs, mixture (Ag + S) and layer by layer (Ag/S) method.

| Sample   | Silanes            |                  |                   |                    | PVP                |                  |                   |                    | Aramid             |                  |                   |                   |                    |
|----------|--------------------|------------------|-------------------|--------------------|--------------------|------------------|-------------------|--------------------|--------------------|------------------|-------------------|-------------------|--------------------|
|          | T <sub>Onset</sub> | T <sub>End</sub> | T <sub>Peak</sub> | ΔH <sub>deg.</sub> | T <sub>Onset</sub> | T <sub>End</sub> | T <sub>Peak</sub> | ΔH <sub>deg.</sub> | T <sub>Onset</sub> | T <sub>End</sub> | T <sub>Peak</sub> | T <sub>Peak</sub> | ΔH <sub>deg.</sub> |
|          | [°C]               | [°C]             | [°C]              | [J/g]              | [°C]               | [°C]             | [°C]              | [J/g]              | [°C]               | [°C]             | [°C]              | [°C]              | [J/g]              |
| PVP      | -                  | -                | -                 | -                  | 398 ± 1            | 472 ± 2          | 433 ± 1           | 460 ± 3            | -                  | -                | -                 | -                 | -                  |
| AgNWs    | -                  | -                | -                 | -                  | 395 ± 2            | 456 ± 1          | 433 ± 2           | 417 ± 2            | -                  | -                | -                 | -                 | -                  |
| mAr      | -                  | -                | -                 | -                  | -                  | -                | -                 | -                  | 411 ± 1            | 486 ± 3          | 439 ± 1           | 461 ± 1           | 100 ± 1            |
| mAr/Ag   | -                  | -                | -                 | -                  | -                  | -                | -                 | -                  | 403 ± 2            | 488 ± 1          | 436 ± 1           | 465 ± 1           | 131 ± 2            |
| mAr/Ag+S | 316 ± 2            | 360 ± 2          | 342 ± 3           | 5 ± 1              | -                  | -                | -                 | -                  | 404 ± 1            | 486 ± 2          | 437 ± 1           | 465 ± 1           | 120 ± 1            |
| mAr/Ag/S | 311 ± 2            | 355 ± 4          | 331 ± 2           | 5 ± 2              | -                  | -                | -                 | -                  | 406 ± 2            | 484 ± 5          | 437 ± 1           | 464 ± 4           | 120 ± 3            |
| pAr      | -                  | -                | -                 | -                  | -                  | -                | -                 | -                  | 525 ± 1            | 590 ± 1          | 549 ± 2           | 581 ± 1           | 271 ± 5            |
| pAr/Ag   | -                  | -                | -                 | -                  | 386 ± 1            | 456 ± 1          | 430 ± 1           | 18 ± 2             | 539 ± 1            | 591 ± 1          | 559 ± 2           | 583 ± 1           | 320 ± 3            |
| pAr/Ag+S | 293 ± 4            | 336 ± 1          | 321 ± 2           | 8 ± 2              | 401 ± 2            | 450 ± 1          | 430 ± 1           | 38 ± 1             | 531 ± 2            | 592 ± 1          | 554 ± 1           | 580 ± 1           | 259 ± 3            |
| pAr/Ag/S | 314 ± 2            | 351 ± 2          | 332 ± 3           | 8 ± 1              | 399 ± 3            | 458 ± 4          | 432 ± 1           | 52 ± 1             | 533 ± 1            | 589 ± 1          | 556 ± 1           | 581 ± 1           | 252 ± 1            |
